# Supplementary material for: Leveraging quality improvement through use of the Systems Assessment Tool in Indigenous primary health care services: a mixed methods study
Source: PubMed Central journal article supplement (PMC5070177; doi:10.1186/s12913-016-1810-y), 2016-10-18
Supplement: 12913_2016_1810_MOESM1_ESM.pdf [file 12913_2016_1810_MOESM1_ESM.pdf]

# Systems assessment tool – All client groups

Version 2.0

September 2012

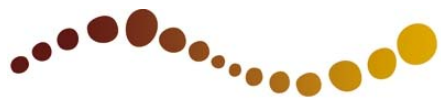

## One21seventy

National Centre for Quality Improvement  
in Indigenous Primary Health Care

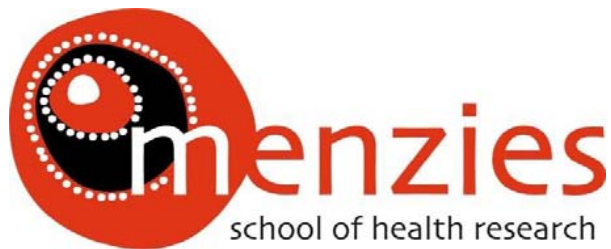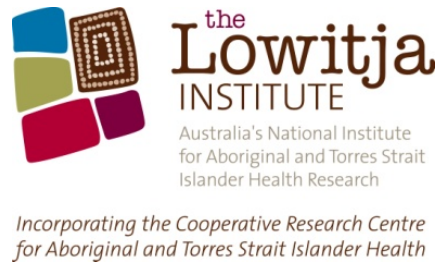

© Menzies School of Health Research 2012

This material is copyright. Apart from use permitted under the *Copyright Act 1968* (Cwlth), all other rights are reserved. No part of this material may be reproduced, by any process, without prior written permission. Parts of this material are available to registered users for download from the One21seventy web-based information system, [www.one21seventy.org.au](http://www.one21seventy.org.au). Requests and enquiries concerning reproduction and rights should be addressed to: Menzies School of Health Research, Darwin Northern Territory, Australia.

First published 2009

## **Acknowledgments**

**We would like to acknowledge and thank all the members who participated in the working group:**

Jenny Brands, Michel Burgum, Kerry Copley, Cynthia Croft, Sue Ferguson-Hill, Jenny Hains, Cath Kennedy, Ru Kwedza, Alison Laycock, Diana Mosca, Estrella Munoz, Louise Patel, Letitia Robinson.

## **Contents**

|                                                                                     |    |
|-------------------------------------------------------------------------------------|----|
| A tool for assessment of health centre systems to support primary health care ..... | 1  |
| Components of the Systems Assessment .....                                          | 3  |
| Component 1 Delivery system design .....                                            | 5  |
| Component 2 Information systems and decision support .....                          | 13 |
| Component 3 Self-management support .....                                           | 16 |
| Component 4 Links with community, other health services and resources .....         | 18 |
| Component 5 Organisational influence and integration .....                          | 23 |

## Version control

| Version | Release date      | Description |
|---------|-------------------|-------------|
| 1.2     | 18 November 2010  | Release     |
| 2.0     | 21 September 2012 | Release     |

## **A tool for assessment of health centre systems to support primary health care**

It is widely recognised that primary health care organisations need to be re-oriented to more effectively address the health challenges of the 21<sup>st</sup> century. Chronic conditions are responsible for a large and increasing burden of illness in communities and make up an increasingly important part of the workload of primary health care centres. Health during pregnancy and early childhood has long term and wide ranging impacts on health, including on the incidence of chronic disease. Mental health concerns are imposing an increasingly heavy burden on the community and on primary health care services. Promotion of good health in general and for priority groups such as pregnant women and children is recognised as an important function for primary health care organisations.

In the context of demands for episodic acute care, systems need to be put in place to meet the ongoing needs of specific client groups. Health centres need practical tools to guide these efforts and to evaluate changes made to their service delivery systems. The Systems Assessment Tool (SAT) has been designed for use by organisations providing primary health care services for Indigenous Australian populations. However, it is expected to be appropriate with minor adaptation for many other settings.

The SAT has evolved from the Chronic Care Model and the associated Assessment of Chronic Illness Care (ACIC) tool (Bonomi et al., 2002) and from the Innovative Care for Chronic Conditions (ICCC) Framework (WHO 2002). It was originally designed for assessing systems for chronic disease care, then adapted for use for maternal and child health.

### **This Generic SAT builds on our experience of using these earlier specific tools, to provide a single tool that can be used for any client group.**

The intended purpose of the tool is to support ongoing quality improvement initiatives through systematic assessment of a range of elements of health centre systems that have been demonstrated to be important. The tool provides for:

- an assessment of the state of development of health centre systems;
- guidance on next steps in planning improvements; and
- assessment of progress in achieving system improvement.

The SAT incorporates the guiding principles of the ICCC Framework: evidence-based decision making; population focus; prevention focus; quality focus; integration; and flexibility/adaptability.

Services are of three types:

1. *Client clinical care services* for those with a diagnosed disease or condition (including pregnancy) – generally health centre based, one-to-one activities
2. *Client services for the prevention and early detection of disease* (including screening, growth monitoring, case finding, brief interventions/counselling – generally health centre based, one-to-one activities but may also include group activities
3. *Population programs and activities* (eg to promote nutrition, breastfeeding, physical activity, oral/dental health, mental health, environmental health, and to reduce harm from tobacco smoke or alcohol) – generally community based

Each of these three types of services is important in effective primary health care. The quality of systems in place to support them may differ quite markedly within the same health centre, both within and between client groups.

The prompts provided in the tool are intended only as a guide to some of the sorts of system issues that one might consider for scoring each item of the tool. They are not intended to cover all relevant issues for all health centres.

Use of the tool provides a score for the state of development of different aspects of health centre systems. The scores may be used as a guide for where improvement efforts might be focussed, but centres should base their priorities on the full range of information available to them and the opportunities they have for improvement in different areas.

References to resources relevant to different clients groups are provided at the end of the tool.

We welcome feedback on the SAT.

## **Components of the Systems Assessment**

### **Delivery system design**

This component refers to the extent to which the design of the health centre's infrastructure, staffing profile and allocation of roles and responsibilities, client flow and care processes maximise the potential effectiveness of the centre

### **Information systems and decision support**

This component refers to the clinical and other information structures (including structures to support clinical decision making) and processes to support the planning, delivery and coordination of care.

### **Self-management support**

This component refers to structures and processes that support clients and families to play a major role in maintaining their health, managing their health problems, and achieving safe and healthy environments.

### **Links with community, other health services and other services.**

This component refers to the extent to which the health centre uses external linkages to inform service planning, links clients to outside resources, works out in the community, and contributes to regional planning and resource development.

### **Organisational influence and integration.**

This component refers to the use of organisational influence to create and support organisational structures and processes that promote safe, high quality care; and how well all system components are integrated across the centre.

| Components                                                     | Items for each component                                                                                                                                                                                                                                                                                                                                                                   |
|----------------------------------------------------------------|--------------------------------------------------------------------------------------------------------------------------------------------------------------------------------------------------------------------------------------------------------------------------------------------------------------------------------------------------------------------------------------------|
| Delivery system design                                         | <ul style="list-style-type: none"> <li>Team structure and function</li> <li>Clinical leadership</li> <li>Appointments and scheduling</li> <li>Care Planning</li> <li>Systematic approach to follow-up</li> <li>Continuity of care</li> <li>Client access/cultural competence</li> <li>Physical infrastructure, supplies and equipment</li> </ul>                                           |
| Information systems and decision support                       | <ul style="list-style-type: none"> <li>Maintenance and use of electronic client lists</li> <li>Evidence based guidelines</li> <li>Specialist-generalist collaborations</li> </ul>                                                                                                                                                                                                          |
| Self-management support                                        | <ul style="list-style-type: none"> <li>Assessment and documentation</li> <li>Self-management education and support, behaviour risk reduction and peer support</li> </ul>                                                                                                                                                                                                                   |
| Links with community, other health services and other services | <ul style="list-style-type: none"> <li>Communication and cooperation on governance and operation of the health centre and other community based organisations and programs</li> <li>Linking health centre clients to outside resources</li> <li>Working in the community</li> <li>Communication and cooperation on regional health planning and development of health resources</li> </ul> |
| Organisational influence and integration                       | <ul style="list-style-type: none"> <li>Organisational commitment</li> <li>Quality improvement strategies</li> <li>Integration of health system components</li> </ul>                                                                                                                                                                                                                       |



## Component 1 Delivery system design

### 1.1 Team structure and function

| Elements for discussion                                                                                                                                                  | Participants score                                                     |   |   |                                                                                                                                  |   |   |                                                                                                                                     |   |   |                                                                                                           |    |    |
|--------------------------------------------------------------------------------------------------------------------------------------------------------------------------|------------------------------------------------------------------------|---|---|----------------------------------------------------------------------------------------------------------------------------------|---|---|-------------------------------------------------------------------------------------------------------------------------------------|---|---|-----------------------------------------------------------------------------------------------------------|----|----|
| <b>Team approach</b><br>Is there security and ongoing availability of all the practitioners required                                                                     | No team approach; practitioners needed for team approach not available |   |   | Some efforts to establish a team approach; practitioners needed for team approach sometimes available, but not secure or ongoing |   |   | Team approach becoming well established; practitioners needed for team approach usually available, becoming more secure and ongoing |   |   | Fully established team approach; secure, ongoing availability of practitioners needed for team approach   |    |    |
| <b>Leadership</b><br>Is it defined and recognised?<br>Does the leader have an appropriate level of formal authority within the practice team?                            |                                                                        |   |   | Team leadership not clearly defined                                                                                              |   |   | Team leadership becoming defined and recognised, leader acquiring formal authority                                                  |   |   | Team leadership clearly defined and recognised, leader has formal authority.                              |    |    |
| <b>Definition of roles and responsibilities and lines of reporting.</b><br>Is these defined for all team members?<br>Are these integrated into the delivery system?      |                                                                        |   |   | Definition of team roles, lines of reporting and integration in system design are fair                                           |   |   | Definition of team roles, lines of reporting and integration in system design are good                                              |   |   | Definition of team roles, lines of reporting and integration in system design are very good               |    |    |
| <b>Communication and cohesion</b><br>Does this exist within the team?<br>Does the team meet regularly?<br>Are there established processes for effective decision making? |                                                                        |   |   | Fair communication and cohesion within the team; team meets irregularly; decision-making is fair                                 |   |   | Good communication and cohesion within the team; team meetings becoming regular; decision-making is good                            |   |   | Very good communication and cohesion within the team; team meetings regular; decision-making is very good |    |    |
| <b>Developing team members' skills and roles</b><br>Is there a strategic approach?                                                                                       |                                                                        |   |   | Development of team members' skills and roles is fair                                                                            |   |   | Development of team members' skills and roles is good                                                                               |   |   | Development of team members' skills and roles is very good                                                |    |    |
| Score                                                                                                                                                                    | 0                                                                      | 1 | 2 | 3                                                                                                                                | 4 | 5 | 6                                                                                                                                   | 7 | 8 | 9                                                                                                         | 10 | 11 |

## 1.2 Clinical leadership

| Elements for discussion                                                                                                                                                                                                                                             | Participants score                |   |                                                                                      |   |   |                                                                                      |   |   |                                                                                           |   |    |    |
|---------------------------------------------------------------------------------------------------------------------------------------------------------------------------------------------------------------------------------------------------------------------|-----------------------------------|---|--------------------------------------------------------------------------------------|---|---|--------------------------------------------------------------------------------------|---|---|-------------------------------------------------------------------------------------------|---|----|----|
|                                                                                                                                                                                                                                                                     | 0                                 | 1 | 2                                                                                    | 3 | 4 | 5                                                                                    | 6 | 7 | 8                                                                                         | 9 | 10 | 11 |
| <b>Clinical leadership</b><br>Is it fully established and recognised in the area?                                                                                                                                                                                   | No or minimal clinical leadership |   | Clinical leadership emerging                                                         |   |   | Clinical leadership becoming established and recognised                              |   |   | Clinical leadership fully established and recognised                                      |   |    |    |
| <b>Contribution</b><br>Does clinical leadership contribute to the centre's vision for high quality care for the client group?                                                                                                                                       |                                   |   | Contribution of clinical leadership to centre's vision for high quality care is fair |   |   | Contribution of clinical leadership to centre's vision for high quality care is good |   |   | Contribution of clinical leadership to centre's vision for high quality care is very good |   |    |    |
| <b>Knowledge about research evidence</b><br>Does clinical leadership help to ensure that the centre remains knowledgeable about research evidence? Is the evidence interpreted and appropriately applied to the centre's clinical services and population programs? |                                   |   | Contribution of clinical leadership to knowledge and application is fair             |   |   | Contribution of clinical leadership to knowledge and application is good             |   |   | Contribution of clinical leadership to knowledge and application is very good             |   |    |    |
| Score                                                                                                                                                                                                                                                               | 0                                 | 1 | 2                                                                                    | 3 | 4 | 5                                                                                    | 6 | 7 | 8                                                                                         | 9 | 10 | 11 |

### 1.3 Appointments and scheduling

| Elements for discussion                                                                                                                                                                                                                                                                                 | Participants score                        |   |   |                                                     |   |   |                                                                          |   |   |                                                                 |    |    |
|---------------------------------------------------------------------------------------------------------------------------------------------------------------------------------------------------------------------------------------------------------------------------------------------------------|-------------------------------------------|---|---|-----------------------------------------------------|---|---|--------------------------------------------------------------------------|---|---|-----------------------------------------------------------------|----|----|
|                                                                                                                                                                                                                                                                                                         | 0                                         | 1 | 2 | 3                                                   | 4 | 5 | 6                                                                        | 7 | 8 | 9                                                               | 10 | 11 |
| <b>Appointment system</b><br>Is there an established appointment system for this area?<br>Does it have the flexibility to systematically accommodate the needs of the client group including – drop-ins, long or family consultations, clients seeing multiple providers in a single visit as required? | No appointment system                     |   |   | Some appointments made; flexibility is ad hoc       |   |   | Appointment system becoming established; flexibility becoming systematic |   |   | Appointment system fully established; flexibility is systematic |    |    |
| <b>Specific clinics and /or sessions</b><br>Are there clinics/sessions with the specialist support available (as appropriate)?<br>Are these clinics/sessions part of routine practice in this area                                                                                                      | Specific clinics and/or sessions not used |   |   | Specific clinics and/or sessions used in ad hoc way |   |   | Specific clinics and/or sessions becoming part of routine practice       |   |   | Specific clinics and/or sessions part of routine practice       |    |    |
| <b>Planning and scheduling</b><br>Is it routine practice for the service's community based activities and programs in this area to be planned/scheduled ahead of time?                                                                                                                                  | No or few community based activities      |   |   | Scheduling of activities/programs is ad hoc         |   |   | Planning/scheduling of activities/programs becoming routine practice     |   |   | Planning/scheduling of activities/programs is routine practice  |    |    |
| <b>Score</b>                                                                                                                                                                                                                                                                                            | 0                                         | 1 | 2 | 3                                                   | 4 | 5 | 6                                                                        | 7 | 8 | 9                                                               | 10 | 11 |

## 1.4 Care Planning

| Elements for discussion                                                                                                                                                                                                 | Participants score          |   |   |                         |   |   |                                                 |   |   |                                        |    |    |
|-------------------------------------------------------------------------------------------------------------------------------------------------------------------------------------------------------------------------|-----------------------------|---|---|-------------------------|---|---|-------------------------------------------------|---|---|----------------------------------------|----|----|
|                                                                                                                                                                                                                         | No or minimal care planning |   |   | Care planning is ad hoc |   |   | Care planning becoming part of routine practice |   |   | Care planning part of routine practice |    |    |
| <b>Routine practice</b><br>Is care planning for clients part of routine practice?                                                                                                                                       |                             |   |   |                         |   |   |                                                 |   |   |                                        |    |    |
| <b>Elements of care planning</b><br>Is it consistent with best practice guidelines?<br>Is it done jointly by providers and clients/families?<br>Includes goal setting/incorporates self management goals and strategies |                             |   |   | Some elements included  |   |   | Most elements included                          |   |   | All elements included                  |    |    |
| Score                                                                                                                                                                                                                   | 0                           | 1 | 2 | 3                       | 4 | 5 | 6                                               | 7 | 8 | 9                                      | 10 | 11 |

## 1.5 Systematic approach to follow-up

| Elements for discussion                                                                                                                                     | Participants score                                            |   |                                                         |   |   |                                                                               |   |   |                                                              |   |    |    |
|-------------------------------------------------------------------------------------------------------------------------------------------------------------|---------------------------------------------------------------|---|---------------------------------------------------------|---|---|-------------------------------------------------------------------------------|---|---|--------------------------------------------------------------|---|----|----|
|                                                                                                                                                             | 0                                                             | 1 | 2                                                       | 3 | 4 | 5                                                                             | 6 | 7 | 8                                                            | 9 | 10 | 11 |
| <b>Electronic flags and reminders</b><br>Are they used to support client care in this area?<br>Is their use consistent across the clinical area?            | No electronic flags/reminders                                 |   | Flags/reminders sometimes used to support client care   |   |   | Flags/reminders usually used to support client care                           |   |   | Flags/reminders consistently used to support client care     |   |    |    |
| <b>Regular services and reviews</b><br>Are clients followed-up in accordance with best practice?<br>Is this part of routine practice?                       | No or minimal follow-up of clients                            |   | Follow-up of clients for regular reviews is ad hoc      |   |   | Follow-up of clients for regular reviews is becoming part of routine practice |   |   | Follow-up of clients for regular reviews is routine practice |   |    |    |
| <b>Abnormal pathology and other test results</b><br>Is follow-up a systematic part of routine practice?                                                     | No or minimal processes for following up abnormal results     |   | Follow-up of abnormal test results is ad hoc            |   |   | Follow-up of abnormal test results is becoming part of routine practice       |   |   | Follow-up of abnormal test results is routine practice       |   |    |    |
| <b>Health centre staff and community knowledge and resources are used to enhance follow-up</b><br>Does it balance duty of care with client self-management? | No or minimal use of available resources to enhance follow-up |   | Use of available resources to enhance follow-up is fair |   |   | Use of available resources to enhance follow-up is good                       |   |   | Use of available resources to enhance follow-up is very good |   |    |    |
| <b>Score</b>                                                                                                                                                | 0                                                             | 1 | 2                                                       | 3 | 4 | 5                                                                             | 6 | 7 | 8                                                            | 9 | 10 | 11 |

## 1.6 Continuity of care

| Elements for discussion                                                                                                                                                                                                                                                                                                                                                                                     | Participants score                                                                |   |                                                                                                 |   |   |                                                                                                             |   |   |                                                                                                          |   |    |    |
|-------------------------------------------------------------------------------------------------------------------------------------------------------------------------------------------------------------------------------------------------------------------------------------------------------------------------------------------------------------------------------------------------------------|-----------------------------------------------------------------------------------|---|-------------------------------------------------------------------------------------------------|---|---|-------------------------------------------------------------------------------------------------------------|---|---|----------------------------------------------------------------------------------------------------------|---|----|----|
| <p><b>Delivery system is designed to enhance continuity of care in this area by having the following elements</b></p> <p>Well organised electronic clinical records and clear documentation<br/>Scheduled follow-up visits<br/>Continuity of provider(s)<br/>Team care<br/>Case management<br/>Shared client records<br/>Orientation of health centre staff to processes to enhance continuity of care.</p> | Delivery system is not designed to enhance continuity of care                     |   | Delivery system beginning to be designed to enhance continuity of care (some elements in place) |   |   | Delivery system quite well designed to enhance continuity of care (most elements in place)                  |   |   | Delivery system very well designed to enhance continuity of care (all or almost all elements in place)   |   |    |    |
| <p><b>Communication between hospital(s) and health centre</b></p> <p>Is the system effective following discharge of clients in this area?</p>                                                                                                                                                                                                                                                               | No or minimal communication between hospital and the health centre post-discharge |   | Post-discharge communication between hospital and the health centre is on an ad hoc basis only  |   |   | System for routine post-discharge communication between hospital and the health centre becoming established |   |   | System for routine post-discharge communication between hospital and the health centre fully established |   |    |    |
| Score                                                                                                                                                                                                                                                                                                                                                                                                       | 0                                                                                 | 1 | 2                                                                                               | 3 | 4 | 5                                                                                                           | 6 | 7 | 8                                                                                                        | 9 | 10 | 11 |

## 1.7 Client access/cultural competence

| Elements for discussion                                                                                                                                                                                                        | Participants score                                                                             |   |   |                                                                                                   |   |   |                                                                                                 |   |   |                                                                                                     |    |    |
|--------------------------------------------------------------------------------------------------------------------------------------------------------------------------------------------------------------------------------|------------------------------------------------------------------------------------------------|---|---|---------------------------------------------------------------------------------------------------|---|---|-------------------------------------------------------------------------------------------------|---|---|-----------------------------------------------------------------------------------------------------|----|----|
|                                                                                                                                                                                                                                | 0                                                                                              | 1 | 2 | 3                                                                                                 | 4 | 5 | 6                                                                                               | 7 | 8 | 9                                                                                                   | 10 | 11 |
| <b>Physical, communication and transport barriers to access</b><br>Do health centre design and processes address client privacy and confidentiality<br>The use of translators (as required)<br>Transport support for referrals | No or minimal attention given to barriers                                                      |   |   | Barriers beginning to be addressed but many remain                                                |   |   | Barriers addressed quite well but some remain                                                   |   |   | Barriers addressed very well and few or none remain                                                 |    |    |
| <b>Staffing</b><br>Is there a systematic approach to ensuring that all health centre staff providing care are culturally competent through staff orientation and training?                                                     | No or minimal attention given to cultural competence; not included in orientation and training |   |   | Level of attention to cultural competence is fair; sometimes included in orientation and training |   |   | Level of attention to cultural competence is good; usually included in orientation and training |   |   | Level of attention to cultural competence is very good; always included in orientation and training |    |    |
| <b>Gender-related issues</b><br>Is there a process in place to ensure respect is applied for gender related issues?                                                                                                            | No or minimal respect for gender-related issues                                                |   |   | Respect for gender-related issues is fair                                                         |   |   | Respect for gender-related issues is good                                                       |   |   | Respect for gender-related issues is very good                                                      |    |    |
| <b>Indigenous knowledge and AHW experience</b><br>Is indigenous knowledge and Aboriginal Health Worker experience respected?<br>Does it inform clinical practice and community based activities?                               | No or minimal respect for Indigenous knowledge or AHW experience                               |   |   | Respect for Indigenous knowledge and AHW experience is fair                                       |   |   | Respect for Indigenous knowledge and AHW experience is good                                     |   |   | Respect for Indigenous knowledge and AHW experience is very good                                    |    |    |
| <b>Score</b>                                                                                                                                                                                                                   | 0                                                                                              | 1 | 2 | 3                                                                                                 | 4 | 5 | 6                                                                                               | 7 | 8 | 9                                                                                                   | 10 | 11 |

## 1.8 Physical infrastructure

| Elements for discussion                                                                                                                                                                                                                   | Participants score                                         |   |   |                                                             |   |   |                                                             |   |   |                                                                  |    |    |
|-------------------------------------------------------------------------------------------------------------------------------------------------------------------------------------------------------------------------------------------|------------------------------------------------------------|---|---|-------------------------------------------------------------|---|---|-------------------------------------------------------------|---|---|------------------------------------------------------------------|----|----|
|                                                                                                                                                                                                                                           | Physical infrastructure unsuitable                         |   |   | Physical infrastructure somewhat suitable                   |   |   | Physical infrastructure quite suitable                      |   |   | Physical infrastructure highly suitable                          |    |    |
| <b>Physical infrastructure</b><br>Is it suitable for provision of care?                                                                                                                                                                   | Appropriateness and availability of consumables is poor    |   |   | Appropriateness and availability of consumables is fair     |   |   | Appropriateness and availability of consumables is good     |   |   | Appropriateness and availability of consumables is very good     |    |    |
| <b>Supplies of consumables</b><br>Are they appropriate and available?                                                                                                                                                                     | Equipment appropriateness, quality and maintenance is poor |   |   | Equipment appropriateness, quality and maintenance are fair |   |   | Equipment appropriateness, quality and maintenance are good |   |   | Equipment appropriateness, quality and maintenance are very good |    |    |
| <b>Equipment</b><br>Is it appropriate and available?<br>Is it of good quality and very well maintained (e.g. does not need to be shared between or borrowed from other consulting areas due to limited availability or poor maintenance?) | 0                                                          | 1 | 2 | 3                                                           | 4 | 5 | 6                                                           | 7 | 8 | 9                                                                | 10 | 11 |
| Score                                                                                                                                                                                                                                     |                                                            |   |   |                                                             |   |   |                                                             |   |   |                                                                  |    |    |



## Component 2 Information systems and decision support

### 2.1 Maintenance and use of electronic client list

| Elements for discussion                                                                                                                                                                                                                        | Participants score |   |                                                                                                                                                     |   |   |                                                                                                                                                                |   |   |                                                                                                                                       |   |    |    |
|------------------------------------------------------------------------------------------------------------------------------------------------------------------------------------------------------------------------------------------------|--------------------|---|-----------------------------------------------------------------------------------------------------------------------------------------------------|---|---|----------------------------------------------------------------------------------------------------------------------------------------------------------------|---|---|---------------------------------------------------------------------------------------------------------------------------------------|---|----|----|
| <b>Electronic list of clients</b><br>Is one available?<br>Is it regularly reviewed according to an established protocol?<br>Is it up to date, including record of place of residence and Medicare number?                                      | No electronic list |   | List available but not reviewed and out of date (covers less than 80% of clients, up-to-date residence and Medicare information sometimes recorded) |   |   | List available, irregularly reviewed and reasonably up to date (covers 80% or more of clients, up-to-date residence and Medicare information usually recorded) |   |   | List available, regularly reviewed and up to date (covers all clients, up-to-date residence and Medicare information always recorded) |   |    |    |
| <b>Regular clients</b><br>Electronic list is routinely used to identify support service planning and delivery? For example, identifying clients for preventive and early detection services according to demographic and risk characteristics. |                    |   | Use of the list to identify regular clients for planning and delivery is ad hoc                                                                     |   |   | Use of list to identify regular clients for planning and delivery becoming routine                                                                             |   |   | Use of list to identify regular clients for planning and delivery is routine                                                          |   |    |    |
| <b>Regular clients with specific conditions</b><br>Electronic list is used to identify to support service planning and delivery? E.g to generate lists of clients for follow-up or regularly scheduled services.                               |                    |   | Use of the list to identify regular clients with specific conditions for planning and service delivery is ad hoc                                    |   |   | Use of the list to identify regular clients with specific conditions for planning and service delivery becoming routine                                        |   |   | Use of the list to identify regular clients with specific conditions for planning and service delivery is routine                     |   |    |    |
| <b>Reaching client groups</b><br>Are strategies implemented as part of routine practice                                                                                                                                                        |                    |   | Implementation of strategies to reach client groups is ad hoc                                                                                       |   |   | Implementation of strategies to reach client groups becoming routine practice                                                                                  |   |   | Implementation of strategies to reach client groups is routine practice                                                               |   |    |    |
| Score                                                                                                                                                                                                                                          | 0                  | 1 | 2                                                                                                                                                   | 3 | 4 | 5                                                                                                                                                              | 6 | 7 | 8                                                                                                                                     | 9 | 10 | 11 |

## 2.2 Evidence based guidelines

| Elements for discussion                                                                                                                                | Participants score                                                                 |   |   |                                                                               |   |   |                                                                               |   |   |                                                                                    |    |    |
|--------------------------------------------------------------------------------------------------------------------------------------------------------|------------------------------------------------------------------------------------|---|---|-------------------------------------------------------------------------------|---|---|-------------------------------------------------------------------------------|---|---|------------------------------------------------------------------------------------|----|----|
| <b>Evidence-based guidelines and other resources</b><br>Are they suitable to the service setting?<br>Are they available and accessible electronically? | No or minimal availability or accessibility of electronic evidence-based resources |   |   | Availability and accessibility of electronic evidence-based resources is fair |   |   | Availability and accessibility of electronic evidence-based resources is good |   |   | Availability and accessibility of electronic evidence-based resources is very good |    |    |
| <b>Evidence-based guidelines and other resources</b><br>Are they used as part of routine practice                                                      | No or minimal use of evidence-based resources                                      |   |   | Use of evidence-based resources is ad hoc                                     |   |   | Use of evidence-based resources becoming part of routine practice             |   |   | Use of evidence-based resources is part of routine practice                        |    |    |
| <b>Training and /or orientation</b><br>Is training /orientation to the use of these resources well integrated into in-service training?                | No or minimal staff training in use of evidence-based resources                    |   |   | Staff training in use of evidence-based resources is fair                     |   |   | Staff training in use of evidence-based resources is good                     |   |   | Staff training in use of evidence-based resources is very good                     |    |    |
| Score                                                                                                                                                  | 0                                                                                  | 1 | 2 | 3                                                                             | 4 | 5 | 6                                                                             | 7 | 8 | 9                                                                                  | 10 | 11 |

### 2.3 Specialist and generalist collaborations

| Elements for discussion                                                                                                                                                                                                                                                                                                                                                                                                                                                                                                    | Participants score                                                                 |   |   |                                             |   |   |                                             |   |   |                                                  |    |    |
|----------------------------------------------------------------------------------------------------------------------------------------------------------------------------------------------------------------------------------------------------------------------------------------------------------------------------------------------------------------------------------------------------------------------------------------------------------------------------------------------------------------------------|------------------------------------------------------------------------------------|---|---|---------------------------------------------|---|---|---------------------------------------------|---|---|--------------------------------------------------|----|----|
| <p><b>Specialist – generalist collaboration</b></p> <p>Is there a strategic approach that results in:</p> <ul style="list-style-type: none"> <li>• Enhanced decision support for clinical care</li> <li>• Effective generalist-specialist communication about client needs and care</li> <li>• Culturally appropriate care across the spectrum of generalist-specialist care</li> </ul> <p>Specialist engagement in the development of community-based programs that promote healthy social and physical environments.</p> | No or minimal specialist-generalist collaboration – i.e. traditional referral only |   |   | Specialist-generalist collaboration is fair |   |   | Specialist-generalist collaboration is good |   |   | Specialist-generalist collaboration is very good |    |    |
| Score                                                                                                                                                                                                                                                                                                                                                                                                                                                                                                                      | 0                                                                                  | 1 | 2 | 3                                           | 4 | 5 | 6                                           | 7 | 8 | 9                                                | 10 | 11 |

## Component 3 Self-management support

### 3.1 Assessment and documentation

| Elements for discussion                                                                                                                                                                                                                                                           | Participants score                                                   |   |                                                                                     |   |   |                                                                                       |   |   |                                                                                 |   |    |    |
|-----------------------------------------------------------------------------------------------------------------------------------------------------------------------------------------------------------------------------------------------------------------------------------|----------------------------------------------------------------------|---|-------------------------------------------------------------------------------------|---|---|---------------------------------------------------------------------------------------|---|---|---------------------------------------------------------------------------------|---|----|----|
|                                                                                                                                                                                                                                                                                   | 0                                                                    | 1 | 2                                                                                   | 3 | 4 | 5                                                                                     | 6 | 7 | 8                                                                               | 9 | 10 | 11 |
| Self-management for clients in this area is supported as a central, strategic part of health care.                                                                                                                                                                                | No or minimal support for self-management                            |   | Fair support for self-management                                                    |   |   | Good support for self-management                                                      |   |   | Very good support for self-management                                           |   |    |    |
| Self-management needs for clients in this area are routinely assessed and documented in a standardised way.                                                                                                                                                                       | Self-management needs are rarely assessed                            |   | Self-management needs sometimes assessed and documented but on an ad hoc basis only |   |   | Assessment and documentation of self-management needs becoming routine practice       |   |   | Assessment and documentation of self-management needs is routine practice       |   |    |    |
| Clients/families in this area are routinely engaged in the assessment and documentation processes.                                                                                                                                                                                | No or minimal engagement of clients/families in assessment processes |   | Clients/families engagement in assessment and documentation is ad hoc               |   |   | Clients/families engagement in assessment and documentation becoming routine practice |   |   | Clients/families engagement in assessment and documentation is routine practice |   |    |    |
| Use of client held records to promote self-management is part of routine practice in this area –<br><br>i.e. tools that are designed to assist clients to adhere to self-management programs and to set goals, track their progress and understand the reasons for health visits. | No or minimal use of client held records                             |   | Use of client held records is ad hoc                                                |   |   | Use of client held records becoming part of routine practice                          |   |   | Use of client held records is part of routine practice                          |   |    |    |
| Score                                                                                                                                                                                                                                                                             | 0                                                                    | 1 | 2                                                                                   | 3 | 4 | 5                                                                                     | 6 | 7 | 8                                                                               | 9 | 10 | 11 |

### 3.2 Self-management education and support, behavioural risk reduction and peer support

| Elements for discussion                                                                                                                                                                                                                                                                                         | Participants score                                                   |   |                                                                                                |   |   |                                                                                                        |   |   |                                                                                               |   |    |    |
|-----------------------------------------------------------------------------------------------------------------------------------------------------------------------------------------------------------------------------------------------------------------------------------------------------------------|----------------------------------------------------------------------|---|------------------------------------------------------------------------------------------------|---|---|--------------------------------------------------------------------------------------------------------|---|---|-----------------------------------------------------------------------------------------------|---|----|----|
| <p><b>Self-management education and support</b><br/>Are routinely provided by staff with recognised training and skills in self-management support?</p>                                                                                                                                                         | No or minimal self-management education or support                   |   | Some self-management education and support by staff with limited training and skills           |   |   | Good self-management education and support by staff with relevant training and skills                  |   |   | Very good self-management education and support by staff with relevant training and skills    |   |    |    |
| <p><b>Involvement of families</b><br/>Are families involved in self-management education and support activities as part of routine practice?</p>                                                                                                                                                                | No or minimal engagement of families in education/support activities |   | Engagement of families in education/ support activities but on an ad hoc basis only            |   |   | Engagement of families in education/ support activities becoming routine practice                      |   |   | Engagement of families in education/ support activities is routine practice                   |   |    |    |
| <p><b>Behavioural risk reduction</b><br/>Is there a systematic approach to behaviour change interventions? For example, brief intervention for alcohol and tobacco risk reduction?<br/>Are brief interventions routinely provided by staff with recognised training and skills in behavioural intervention?</p> | No or minimal provision of behaviour change interventions            |   | Some behavioural interventions provided but by staff with limited relevant training and skills |   |   | Behavioural interventions by staff with relevant training and skills becoming part of routine practice |   |   | Behavioural interventions by staff with relevant training and skills part of routine practice |   |    |    |
| <p><b>Educational resources</b><br/>Are good quality educational resources used for clients and families to support behavioural risk reduction self-management?<br/>Is this part of routine practice?</p>                                                                                                       | No or minimal use of resources to support self-management            |   | Some use of resources to support self-management                                               |   |   | Use of resources to support self-management becoming routine practice                                  |   |   | Use of resources to support self-management is routine practice                               |   |    |    |
| <p><b>Community peer support</b><br/>Is promotion and support for programs and activities a central, strategic part of health care?</p>                                                                                                                                                                         | No or minimal promotion or support for peer support                  |   | Promotion and support for peer support is ad hoc                                               |   |   | Promotion and support for peer support is becoming a central, strategic part of care                   |   |   | Promotion and support for peer support is a central, strategic part of care                   |   |    |    |
| Score                                                                                                                                                                                                                                                                                                           | 0                                                                    | 1 | 2                                                                                              | 3 | 4 | 5                                                                                                      | 6 | 7 | 8                                                                                             | 9 | 10 | 11 |

## Component 4 Links with community, other health services and resources

### 4.1 Communication and cooperation on governance and operation of the health centre and other community based organisations and programs

| Elements for discussion                                                                                                                                                                                                                                                                                    | Participants score                                         |   |   |                                                                                      |   |   |                                                                                      |   |   |                                                                                           |    |    |
|------------------------------------------------------------------------------------------------------------------------------------------------------------------------------------------------------------------------------------------------------------------------------------------------------------|------------------------------------------------------------|---|---|--------------------------------------------------------------------------------------|---|---|--------------------------------------------------------------------------------------|---|---|-------------------------------------------------------------------------------------------|----|----|
| <b>Community input to health centre governance</b><br>Are there well-functioning arrangements?                                                                                                                                                                                                             | No community input to governance                           |   |   | Community input to governance is fair                                                |   |   | Community input to governance is good                                                |   |   | Community input into governance is very good                                              |    |    |
| <b>Involvement of service population</b><br>Is there a systematic approach to in service planning and feedback?<br>Does it include input through an annual general meeting and reference groups/committees?<br>Does it have formal mechanisms for dissemination of health service performance information? | No service population involvement in planning and feedback |   |   | Service population involvement in planning and feedback is ad hoc.                   |   |   | Service population involvement in planning and feedback is becoming systematic       |   |   | Service population involvement in planning and feedback is systematic                     |    |    |
| <b>Client satisfaction with the health centre's services</b><br>Are they systematically and routinely assessed?                                                                                                                                                                                            | Client satisfaction never or rarely assessed               |   |   | Assessment of client satisfaction is ad hoc                                          |   |   | Assessment of client satisfaction is becoming systematic and routine                 |   |   | Assessment of client satisfaction is systematic and routine                               |    |    |
| <b>Formal agreements between the health centre and mainstream primary care services (including Divisions of Primary Care) and other health and community services relevant to this area</b><br>Are agreements in place?<br>Do they involve good communication and ongoing, strategic activities?           | No formal agreements with other services                   |   |   | Formal agreements with other services with fair communication and levels of activity |   |   | Formal agreements with other services with good communication and levels of activity |   |   | Formal agreements with other services with very good communication and levels of activity |    |    |
| Score                                                                                                                                                                                                                                                                                                      | 0                                                          | 1 | 2 | 3                                                                                    | 4 | 5 | 6                                                                                    | 7 | 8 | 9                                                                                         | 10 | 11 |

4.1 continued....

| Elements for discussion                                                                                                                                                                                                                                                                                                                                                            | Participants score                               |   |   |                                                  |   |   |                                                  |   |   |                                                       |    |    |
|------------------------------------------------------------------------------------------------------------------------------------------------------------------------------------------------------------------------------------------------------------------------------------------------------------------------------------------------------------------------------------|--------------------------------------------------|---|---|--------------------------------------------------|---|---|--------------------------------------------------|---|---|-------------------------------------------------------|----|----|
|                                                                                                                                                                                                                                                                                                                                                                                    | 0                                                | 1 | 2 | 3                                                | 4 | 5 | 6                                                | 7 | 8 | 9                                                     | 10 | 11 |
| <p><b>Partnership with relevant community groups</b></p> <p>Are there well-functioning arrangements for the health centre to work in?<br/>E.g. municipal councils, schools, women's centres, resource centres, art centres, child care centres, sport and recreation groups, cultural programs.<br/>Does this help to ensure community programs have a positive health impact?</p> | No or poor partnerships with community groups    |   |   | Partnerships with community groups are fair      |   |   | Partnerships with community groups are good      |   |   | Partnerships with community groups are very good      |    |    |
| <p><b>Health orientation</b></p> <p>Do community, social, education and other programs and organisations have a strong health orientation?</p>                                                                                                                                                                                                                                     | Health orientation of community programs is weak |   |   | Health orientation of community programs is fair |   |   | Health orientation of community programs is good |   |   | Health orientation of community programs is very good |    |    |
| <b>Score</b>                                                                                                                                                                                                                                                                                                                                                                       | 0                                                | 1 | 2 | 3                                                | 4 | 5 | 6                                                | 7 | 8 | 9                                                     | 10 | 11 |

## 4.2 Linking health centre clients to outside resources

| Elements for discussion                                                                                                                          | Participants score                                                                 |   |   |                                                                                 |   |   |                                                                                 |   |   |                                                                                      |    |    |
|--------------------------------------------------------------------------------------------------------------------------------------------------|------------------------------------------------------------------------------------|---|---|---------------------------------------------------------------------------------|---|---|---------------------------------------------------------------------------------|---|---|--------------------------------------------------------------------------------------|----|----|
|                                                                                                                                                  | 0                                                                                  | 1 | 2 | 3                                                                               | 4 | 5 | 6                                                                               | 7 | 8 | 9                                                                                    | 10 | 11 |
| There are systematic arrangements in place to link individual clients in this area to outside health and health-related resources.               | No or minimal arrangements for linking clients to outside resources                |   |   | Arrangements for linking clients to outside resources ad hoc                    |   |   | Arrangements for linking clients to outside resources becoming systematic       |   |   | Arrangements for linking clients to outside resources are systematic                 |    |    |
| The resource directory that supports systematic arrangements is comprehensive, regularly updated, is easily accessible and widely used by staff. | No resource directory –                                                            |   |   | Resource directory – comprehensiveness, updating accessibility and use are fair |   |   | Resource directory – comprehensiveness, updating accessibility and use are good |   |   | Resource directory – comprehensiveness, updating accessibility and use are very good |    |    |
| Linkage arrangements relating to these resources are well integrated into staff orientation and in-service training programs.                    | No or minimal integration of linkage arrangements in staff orientation or training |   |   | Integration of linkage arrangements in staff orientation or training is fair    |   |   | Integration of linkage arrangements in staff orientation or training is good    |   |   | Integration of linkage arrangements in staff orientation or training is very good    |    |    |
| Score                                                                                                                                            | 0                                                                                  | 1 | 2 | 3                                                                               | 4 | 5 | 6                                                                               | 7 | 8 | 9                                                                                    | 10 | 11 |



### 4.3 Working out in the community

| Elements for discussion                                                                                                                                                                                        | Participants score                                                       |   |   |                                                                             |   |   |                                                                             |   |   |                                                                                  |    |    |
|----------------------------------------------------------------------------------------------------------------------------------------------------------------------------------------------------------------|--------------------------------------------------------------------------|---|---|-----------------------------------------------------------------------------|---|---|-----------------------------------------------------------------------------|---|---|----------------------------------------------------------------------------------|----|----|
|                                                                                                                                                                                                                | 0                                                                        | 1 | 2 | 3                                                                           | 4 | 5 | 6                                                                           | 7 | 8 | 9                                                                                | 10 | 11 |
| <b>Staff engagement</b><br>Are staff engaged in community health promotion/development activities?<br>e.g in pre-schools and schools; men's, women's and youth groups;<br>community centres; community stores. | No or minimal staff engagement in community health promotion/development |   |   | Level of staff engagement in community health promotion/development is fair |   |   | Level of staff engagement in community health promotion/development is good |   |   | Level of staff engagement in community health promotion/development is very good |    |    |
| <b>Design of community activities</b><br>Are community activities well-designed?<br>Do they meet identified needs of different groups?                                                                         |                                                                          |   |   | Design of community activities is fair                                      |   |   | Design of community activities is good                                      |   |   | Design of community activities is very good                                      |    |    |
| <b>Integration</b><br>Are community activities fully integrated into the centre's programs?                                                                                                                    |                                                                          |   |   | Integration of community activities into centre's programs is fair          |   |   | Integration of community activities into centre's programs is good          |   |   | Integration of community activities into centre's programs is very good          |    |    |
| Score                                                                                                                                                                                                          | 0                                                                        | 1 | 2 | 3                                                                           | 4 | 5 | 6                                                                           | 7 | 8 | 9                                                                                | 10 | 11 |

#### 4.4 Communication and cooperation on regional health planning and development of health resources

| Elements for discussion                                                                                                                                                                        | Participants score                                         |   |   |                                                      |   |   |                                                      |   |   |                                                           |    |    |
|------------------------------------------------------------------------------------------------------------------------------------------------------------------------------------------------|------------------------------------------------------------|---|---|------------------------------------------------------|---|---|------------------------------------------------------|---|---|-----------------------------------------------------------|----|----|
| <b>Regional planning</b><br>Are health centre staff actively engaged in and promote regional planning?                                                                                         | No or minimal engagement in regional planning              |   |   | Level of engagement in regional planning is fair     |   |   | Level of engagement in regional planning is good     |   |   | Level of engagement in regional planning is very good     |    |    |
| <b>Health resources</b><br>Do health centre staff actively contribute to the development and promotion of standard resources for health services that have region-wide relevance in this area? | No or minimal contribution to the development of resources |   |   | Contribution to the development of resources is fair |   |   | Contribution to the development of resources is good |   |   | Contribution to the development of resources is very good |    |    |
| <b>Local community plans</b><br>Are plans systematically used to inform regional planning processes and allocation of resources?                                                               | No or minimal use of community plans                       |   |   | Use of community plans is ad hoc                     |   |   | Use of community plans is becoming systematic        |   |   | Use of community plans is systematic.                     |    |    |
| Score                                                                                                                                                                                          | 0                                                          | 1 | 2 | 3                                                    | 4 | 5 | 6                                                    | 7 | 8 | 9                                                         | 10 | 11 |

## Component 5 Organisational influence and integration

### 5.1 Organisational commitment

| Elements for discussion                                                                                                                                                                                                                | Participants score                                                 |   |   |                                                            |   |   |                                                                                 |   |   |                                                                                     |    |    |
|----------------------------------------------------------------------------------------------------------------------------------------------------------------------------------------------------------------------------------------|--------------------------------------------------------------------|---|---|------------------------------------------------------------|---|---|---------------------------------------------------------------------------------|---|---|-------------------------------------------------------------------------------------|----|----|
| <b>Strategic and business plans</b><br>Do they reflect commitment to this client group<br>i.e. vision statement, policies, financing, staffing, strategies?                                                                            | No plans; little or no interest in a plan                          |   |   | Plans in place; level of commitment is fair                |   |   | Plans in place; level of commitment is good                                     |   |   | Plans in place; level of commitment is very good                                    |    |    |
| <b>Funding</b><br>Is there specific funding for this area that is at an adequate level and long-term?                                                                                                                                  | No specific funding                                                |   |   | Specific funding, level is fair and/or short term          |   |   | Specific funding, level is good and/or medium term                              |   |   | Specific funding, level is very good and/or long term                               |    |    |
| <b>Staffing</b><br>Do staffing levels meet the established need?<br>Are all the relevant roles defined and these roles reflected in job descriptions?                                                                                  | Minimal staffing; no specific roles                                |   |   | Level of staffing is fair; some roles defined              |   |   | Level of staffing is good; most roles defined and reflected in job descriptions |   |   | Level of staffing is very good; all roles defined and reflected in job descriptions |    |    |
| <b>Staff relationships and morale</b><br>Are there good relationships and regular, clear communication among staff?<br>Where is morale high?<br>Is there a feeling among line staff that senior staff understand their work and needs? | Poor relationships and little or no communication<br>Morale is low |   |   | Relationships and communication are fair<br>Morale is fair |   |   | Relationships and communication are good<br>Morale is good                      |   |   | Relationships and communication are very good<br>Morale is very good                |    |    |
| <b>Training</b><br>What is the range of training and in-service opportunities for staff working in this area?                                                                                                                          | Range of training and in-service opportunities is poor             |   |   | Range of training and in-service opportunities is fair     |   |   | Range of training and in-service opportunities is good                          |   |   | Range of training and in-service opportunities is very good                         |    |    |
| <b>Service delivery strategies</b><br>Is there a range of service delivery strategies in this area across individual clinical, group and population based activities (as appropriate)                                                  | Range of service delivery strategies is poor                       |   |   | Range of service delivery strategies is fair               |   |   | Range of service delivery strategies is good                                    |   |   | Range of service delivery strategies is very good                                   |    |    |
| Score                                                                                                                                                                                                                                  | 0                                                                  | 1 | 2 | 3                                                          | 4 | 5 | 6                                                                               | 7 | 8 | 9                                                                                   | 10 | 11 |

## 5.2 Quality improvement strategies

| Elements for discussion                                                                                                                                                                                                                                                                                        | Participants score                                          |   |   |                                                                 |   |   |                                                                        |   |   |                                                                      |    |    |
|----------------------------------------------------------------------------------------------------------------------------------------------------------------------------------------------------------------------------------------------------------------------------------------------------------------|-------------------------------------------------------------|---|---|-----------------------------------------------------------------|---|---|------------------------------------------------------------------------|---|---|----------------------------------------------------------------------|----|----|
| <p><b>Senior staff support for quality improvement</b><br/>Do senior staff support quality improvement?<br/>Is it resourced?<br/>Is staff training provided?<br/>Is participation encouraged?<br/>Do staff have authority to make improvements?<br/>Is effectiveness evaluated?</p>                            | No or minimal senior staff support for quality improvement  |   |   | Limited senior staff support for quality improvement            |   |   | Senior staff support quality improvement but not fully or consistently |   |   | Quality improvement fully and consistently supported by senior staff |    |    |
| <p><b>Quality improvement processes</b><br/>Are there systematic processes in place?<br/>Are they used consistently?<br/>e.g. cyclical processes of evidence-based assessment of health centre performance using good quality data, review and planning involving the whole team, and service improvement.</p> | No or minimal quality improvement processes                 |   |   | Ad hoc quality improvement processes                            |   |   | Systematic quality improvement processes but not used consistently     |   |   | Systematic quality improvement processes used consistently           |    |    |
| <p><b>Health centre performance reporting</b><br/>Is the electronic client information system routinely used in this area?<br/>e.g. including profiles and needs of client groups, care delivery and client outcomes</p>                                                                                       | No electronic client information system                     |   |   | Use of the system for reporting on centre performance is ad hoc |   |   | Use of the system for reporting on centre performance becoming routine |   |   | Use of the system for reporting on centre performance is routine     |    |    |
| <p><b>Processes for dealing with errors and problems</b><br/>Are systematic processes in place for dealing with errors or problems with care delivery?<br/>Do they include routine identification, examination of root causes and follow through appropriate action and regular review?</p>                    | No or minimal processes for dealing with errors or problems |   |   | Processes for dealing with errors or problems are ad hoc        |   |   | Processes for dealing with errors becoming systematic                  |   |   | Processes for dealing with errors systematic                         |    |    |
| Score                                                                                                                                                                                                                                                                                                          | 0                                                           | 1 | 2 | 3                                                               | 4 | 5 | 6                                                                      | 7 | 8 | 9                                                                    | 10 | 11 |

### 5.3 Integration of health system components

| Elements for discussion                                                                                                                                                                                                                                                                                                                                                                                                                                                                                                                                                                                                                                                                                                                                                                                                                                                                                                                                                                                                                                | Participants score        |   |   |                           |   |   |                           |   |   |                                |    |    |
|--------------------------------------------------------------------------------------------------------------------------------------------------------------------------------------------------------------------------------------------------------------------------------------------------------------------------------------------------------------------------------------------------------------------------------------------------------------------------------------------------------------------------------------------------------------------------------------------------------------------------------------------------------------------------------------------------------------------------------------------------------------------------------------------------------------------------------------------------------------------------------------------------------------------------------------------------------------------------------------------------------------------------------------------------------|---------------------------|---|---|---------------------------|---|---|---------------------------|---|---|--------------------------------|----|----|
| <p><b>Integration</b></p> <p>There is clear recognition of the need for and importance of integration across the health centre.</p> <p>How well the information system supports clinical decision making (by making guidelines accessible) or self-management (by allowing recording of client goals)</p> <p>How well the funding and human resources arrangements support team care</p> <p>How well work within and outside the health centre complement each other</p> <p>How well staff training supports continuity of care.</p> <p>This is reflected in all documents/processes/activities including:</p> <ul style="list-style-type: none"> <li>• Business plan</li> <li>• Policy statements</li> <li>• Financing arrangements</li> <li>• Information system</li> <li>• Regulation/legislation</li> <li>• Deployment of human resources</li> <li>• Leadership and advocacy roles</li> <li>• Care processes</li> <li>• Education and in-service programs</li> <li>• Work outside the health centre</li> <li>• Partnership arrangements</li> </ul> | No or minimal integration |   |   | Fair level of integration |   |   | Good level of integration |   |   | Very good level of integration |    |    |
| Score                                                                                                                                                                                                                                                                                                                                                                                                                                                                                                                                                                                                                                                                                                                                                                                                                                                                                                                                                                                                                                                  | 0                         | 1 | 2 | 3                         | 4 | 5 | 6                         | 7 | 8 | 9                              | 10 | 11 |
