# Supplementary material for: Leveraging quality improvement through use of the Systems Assessment Tool in Indigenous primary health care services: a mixed methods study
Source: PubMed Central journal article supplement (PMC5070177; doi:10.1186/s12913-016-1810-y), 2016-10-18
Supplement: 12913_2016_1810_MOESM3_ESM.pdf [file 12913_2016_1810_MOESM3_ESM.pdf]

# Systems assessment scoring form

## Options for scoring

### 1. A single Systems Assessment for whole of the service

If your health service has decided to complete a single Systems Assessment you will be required to answer '1-Yes' to all service delivery areas listed (in figure 1). Copy all scores and justifications into data entry text boxes for each numbered item on the web site. This will ensure your System Assessment results will appear in each of the clinical audit reports generated.

### 2. A single service delivery area Systems Assessment

A separate scoring form will need to be completed for a service delivery area if the Systems Assessment is to be conducted by an individual team. In this case only answer '1-Yes' to the service delivery area selected (figure 1).

**Health centre code:**

**Date:**

Name of persons participating in the systems assessment:

## Service delivery areas covered by this Systems Assessment

Indicate the areas that will be covered in this systems assessment.

### Figure 1: Service delivery areas

|                      |       |      |
|----------------------|-------|------|
| Child health         | 1-Yes | 0-No |
| Maternal health      | 1-Yes | 0-No |
| Mental health        | 1-Yes | 0-No |
| Preventive services  | 1-Yes | 0-No |
| RHD/ ARF             | 1-Yes | 0-No |
| Vascular & Metabolic | 1-Yes | 0-No |

## Using the scoring form

Provide an agreed score and a sentence explaining the justification for the score your health service decides upon for each item.

The overall numerical score and justifications are entered into the One21seventy database. A maximum of 500 characters can be entered for each justification.

## Contact us

For more information or to provide feedback on the Systems Assessment please contact One21seventy  
Phone: 1800 082 474 or email [one21seventy@menzies.edu.au](mailto:one21seventy@menzies.edu.au).

## Component 1 Delivery system design

### 1.1 Team structure and function

| Element for discussion                                        | Score | Justification for overall score (500 characters) |
|---------------------------------------------------------------|-------|--------------------------------------------------|
| Team approach                                                 |       |                                                  |
| Team leadership                                               |       |                                                  |
| Definition of roles and responsibilities                      |       |                                                  |
| Communication and cohesion                                    |       |                                                  |
| Developing team members skills and rolls                      |       |                                                  |
| <b>Overall score either by average or consensus approach.</b> |       |                                                  |

### 1.2 Clinical leadership

| Element for discussion                                        | Score | Justification for overall score |
|---------------------------------------------------------------|-------|---------------------------------|
| Clinical leadership                                           |       |                                 |
| Contribution                                                  |       |                                 |
| Knowledge about research evidence                             |       |                                 |
| <b>Overall score either by average or consensus approach.</b> |       |                                 |

### 1.3 Appointments and scheduling

| Element for discussion                                        | Score | Justification for overall score |
|---------------------------------------------------------------|-------|---------------------------------|
| Appointment system                                            |       |                                 |
| Specific clinics and / or sessions                            |       |                                 |
| Planning and scheduling                                       |       |                                 |
| <b>Overall score either by average or consensus approach.</b> |       |                                 |

### 1.4 Care Planning

| Element for discussion                                        | Score | Justification for overall score |
|---------------------------------------------------------------|-------|---------------------------------|
| Routine practice                                              |       |                                 |
| Elements of care planning                                     |       |                                 |
| <b>Overall score either by average or consensus approach.</b> |       |                                 |

### 1.5 Systematic approach to follow-up

| Element for discussion                                                                  | Score | Justification for overall score |
|-----------------------------------------------------------------------------------------|-------|---------------------------------|
| Electronic flags and reminders                                                          |       |                                 |
| Regular services and reviews                                                            |       |                                 |
| Abnormal pathology and other test results                                               |       |                                 |
| Health centre staff and community knowledge and resources are used to enhance follow-up |       |                                 |
| <b>Overall score either by average or consensus approach.</b>                           |       |                                 |

### 1.6 Continuity of care

| Element for discussion                                        | Score | Justification for overall score |
|---------------------------------------------------------------|-------|---------------------------------|
| Delivery system designed to enhance continuity of care        |       |                                 |
| Communication between hospital(s) and health centre           |       |                                 |
| <b>Overall score either by average or consensus approach.</b> |       |                                 |

### 1.7 Client access/cultural competence

| Element for discussion                                        | Score | Justification for overall score |
|---------------------------------------------------------------|-------|---------------------------------|
| Physical, communication and transport barriers to access      |       |                                 |
| Staffing                                                      |       |                                 |
| Gender-related issues                                         |       |                                 |
| Indigenous knowledge and AWH experience                       |       |                                 |
| <b>Overall score either by average or consensus approach.</b> |       |                                 |

### 1.8 Physical infrastructure

| Element for discussion                                        | Score | Justification for overall score |
|---------------------------------------------------------------|-------|---------------------------------|
| Physical infrastructure                                       |       |                                 |
| Supplies of consumables                                       |       |                                 |
| Equipment                                                     |       |                                 |
| <b>Overall score either by average or consensus approach.</b> |       |                                 |

## Component 2 Information systems and decision support

### 2.1 Maintenance and use of electronic client list

| Element for discussion                                        | Score | Justification for overall score |
|---------------------------------------------------------------|-------|---------------------------------|
| Electronic list of clients                                    |       |                                 |
| Regular clients                                               |       |                                 |
| Regular clients with specific conditions                      |       |                                 |
| Reaching client groups                                        |       |                                 |
| <b>Overall score either by average or consensus approach.</b> |       |                                 |

### 2.2 Evidence based guidelines

| Element for discussion                                                             | Score | Justification for overall score |
|------------------------------------------------------------------------------------|-------|---------------------------------|
| Evidence-based guidelines and other resources                                      |       |                                 |
| Evidence-based guidelines and other resources are used as part of routine practice |       |                                 |
| Training and /or orientation                                                       |       |                                 |
| <b>Overall score either by average or consensus approach.</b>                      |       |                                 |

### 2.3 Specialist and generalist collaborations

| Element for discussion                                        | Score | Justification for overall score |
|---------------------------------------------------------------|-------|---------------------------------|
| Specialist – generalist collaboration                         |       |                                 |
| <b>Overall score either by average or consensus approach.</b> |       |                                 |

## Component 3 Self-management support

### 3.1 Assessment and documentation

| Element for discussion                                                 | Score | Justification for overall score |
|------------------------------------------------------------------------|-------|---------------------------------|
| Self-management for clients is strategically supported                 |       |                                 |
| Self-management is routinely assessed and documented                   |       |                                 |
| Clients/families are routinely engaged in assessment and documentation |       |                                 |
| Use of client hand held records                                        |       |                                 |
| <b>Overall score either by average or consensus approach.</b>          |       |                                 |

### 3.2 Self-management education and support, behavioural risk reduction and peer support

| Element for discussion                                        | Score | Justification for overall score |
|---------------------------------------------------------------|-------|---------------------------------|
| Self-management education and support                         |       |                                 |
| Involvement of families                                       |       |                                 |
| Behavioural risk reduction                                    |       |                                 |
| Educational resources                                         |       |                                 |
| Community peer support                                        |       |                                 |
| <b>Overall score either by average or consensus approach.</b> |       |                                 |

## Component 4 Links with community, other health services and resources

### 4.1 Communication and cooperation on governance and operation of the health centre and other community based organisations and programs

| Element for discussion                                                           | Score | Justification for overall score |
|----------------------------------------------------------------------------------|-------|---------------------------------|
| Community input to health centre governance                                      |       |                                 |
| Involvement of service population                                                |       |                                 |
| Client satisfaction with the health centre's services                            |       |                                 |
| Formal agreements between the health centre and mainstream primary care services |       |                                 |
| Partnership with relevant community groups                                       |       |                                 |
| Health orientation                                                               |       |                                 |
| <b>Overall score either by average or consensus approach.</b>                    |       |                                 |

### 4.2 Linking health centre clients to outside resources

| Element for discussion                                                       | Score | Justification for overall score |
|------------------------------------------------------------------------------|-------|---------------------------------|
| Systematic arrangements in place to link clients to outside health resources |       |                                 |
| Resource directory                                                           |       |                                 |
| Linking arrangements is integrated into staff orientation                    |       |                                 |
| <b>Overall score either by average or consensus approach.</b>                |       |                                 |

### 4.3 Working out in the community

| Element for discussion                                        | Score | Justification for overall score |
|---------------------------------------------------------------|-------|---------------------------------|
| Staff engagement                                              |       |                                 |
| Design of community activities                                |       |                                 |
| Integration                                                   |       |                                 |
| <b>Overall score either by average or consensus approach.</b> |       |                                 |

### 4.4 Communication and cooperation on regional health planning and development of health resources

| Element for discussion                                        | Score | Justification for overall score |
|---------------------------------------------------------------|-------|---------------------------------|
| Regional planning                                             |       |                                 |
| Health resources                                              |       |                                 |
| Local community plans                                         |       |                                 |
| <b>Overall score either by average or consensus approach.</b> |       |                                 |



## Component 5 Information systems and decision support

### 5.1 Organisational commitment

| Element for discussion                                        | Score | Justification for overall score |
|---------------------------------------------------------------|-------|---------------------------------|
| Strategic and business plans                                  |       |                                 |
| Funding                                                       |       |                                 |
| Staffing                                                      |       |                                 |
| Staff relationships and morale                                |       |                                 |
| Training                                                      |       |                                 |
| Service delivery strategies                                   |       |                                 |
| <b>Overall score either by average or consensus approach.</b> |       |                                 |

### 5.2 Quality improvement strategies

| Element for discussion                                        | Score | Justification for overall score |
|---------------------------------------------------------------|-------|---------------------------------|
| Senior staff support for quality improvement                  |       |                                 |
| Quality improvement processes                                 |       |                                 |
| Health centre performance reporting                           |       |                                 |
| Processes for dealing with errors and problems                |       |                                 |
| <b>Overall score either by average or consensus approach.</b> |       |                                 |

### 5.3 Integration of health system components

| Element for discussion                                        | Score | Justification for overall score |
|---------------------------------------------------------------|-------|---------------------------------|
| Integration                                                   |       |                                 |
| <b>Overall score either by average or consensus approach.</b> |       |                                 |
